# Supplementary material for: Effects of Impurities from Sugar Excipient on Filtrate Flux during Ultrafiltration and Diafiltration Process
Source: MDPI journal article supplement (doi:10.3390/membranes11100775), 2021-10-11
Supplement: s1 [file s1]

Supplementary Material

# Effects of Impurities from Sugar Excipient on Filtrate Flux during Ultrafiltration and Diafiltration Process

Jieun Lee, Jiwon Na and Youngbin Baek \*

Department of Biotechnology, Sungshin Women's University, Seoul 01133, Korea; je\_0229@nate.com (J.L.); qas111026@gmail.com (J.N.)

\* Correspondence: ybbaek@sungshin.ac.kr

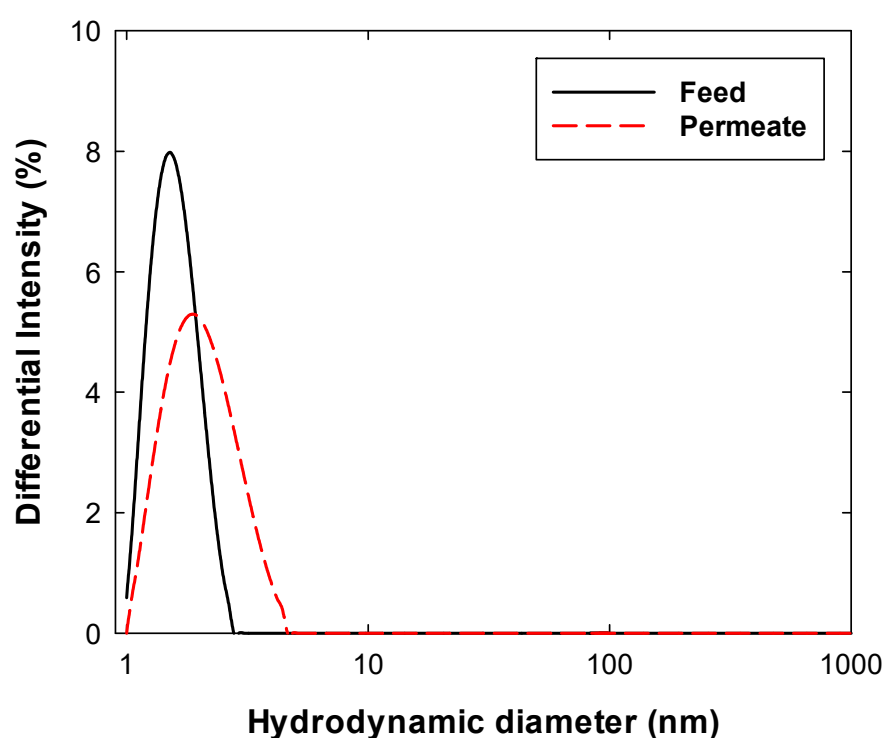

**Figure S1.** Hydrodynamic diameter of maltose measured using dynamic light scattering. Feed was prepared as 20 mM histidine with 100 mM maltose solution at pH 6 and permeate was collected after filtration experiment.

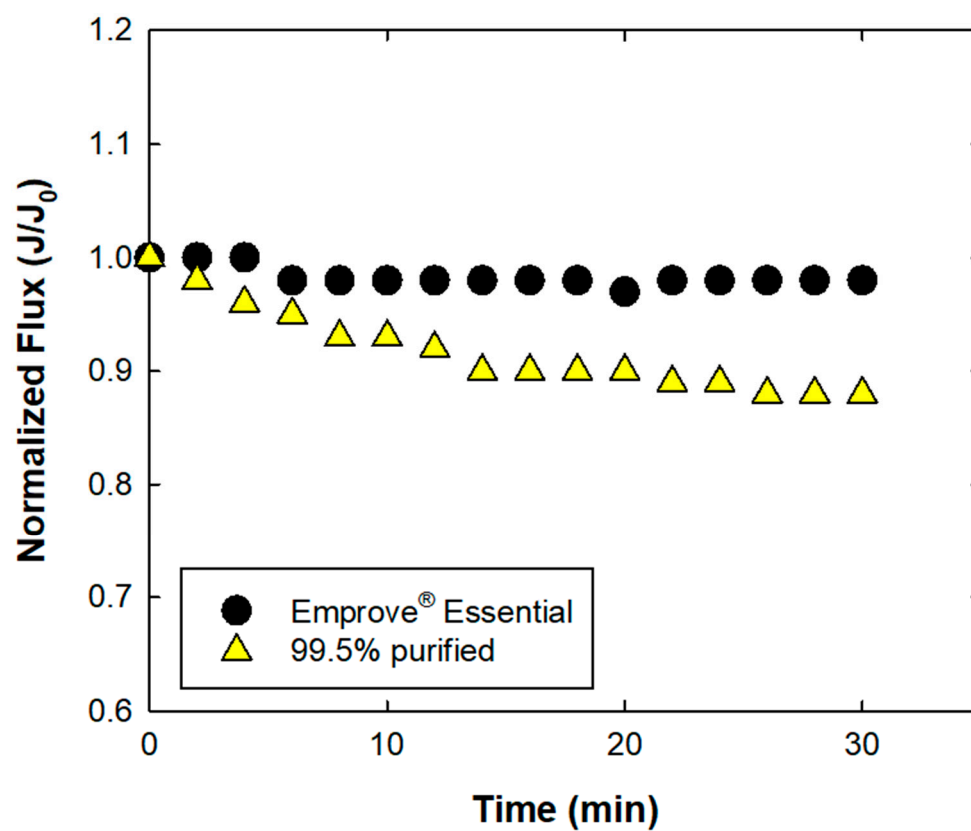

**Figure S2.** Normalized flux as a function of operation time during ultrafiltration experiment using a tangential flow filtration system at a flow rate of 45 mL/min and a TMP of 100 kPa. Feed solution was 20 mM histidine with 100 mM sucrose solution at pH 6. Two types of sucrose were used; Emprove® Essential which is high-quality products for biopharmaceutical formulation (black circle) and 99.5% purified sucrose (yellow triangle).
